# Supplementary material for: Comparison and evaluation of anthropogenic emissions of SO&lt;sub&gt;2&lt;/sub&gt;and NO&lt;sub&gt;x over China
Source: Copernicus journal article supplement (doi:10.5194/acp-2017-646), 2017-08-04
Supplement: Supplementary file 1 [file acp-2017-646-supplement.pdf]

## **Comparison and evaluation of anthropogenic emissions of SO<sub>2</sub> and NO<sub>x</sub> over China**

Meng Li<sup>1,3,a</sup>, Zbigniew Klimont<sup>2</sup>, Qiang Zhang<sup>1</sup>, Randall V. Martin<sup>4</sup>, Bo Zheng<sup>3</sup>, Chris Heyes<sup>2</sup>, Janusz Cofala<sup>2</sup>, and Kebin He<sup>3</sup>

<sup>1</sup>Ministry of Education Key Laboratory for Earth System Modeling, Department for Earth System Science, Tsinghua University, Beijing, China

<sup>2</sup>International Institute for Applied Systems Analysis (IIASA), Laxenburg, 2361, Austria

<sup>3</sup>State Key Joint Laboratory of Environment Simulation and Pollution Control, School of Environment, Tsinghua University, Beijing, China

<sup>4</sup>Department of Physics and Atmospheric Science, Dalhousie University, Halifax, Canada

<sup>a</sup>now at Max-Planck Institute for Chemistry, Mainz, Germany

*Correspondence to:* Meng Li (M.Li@mpic.de)

**Table S1. Fuel distribution among sectors in ECLIPSE and MIX emission inventories, 2010**

| Inventories                 | ECLIPSE          | MIX  |
|-----------------------------|------------------|------|
| Coal <sup>a</sup> , Mt coal |                  |      |
| Power                       | 1743             | 1576 |
| Industry                    | 747              | 968  |
| Heating                     | n/a <sup>b</sup> | 259  |
| Residential                 | 301              | 222  |
| Coal sum                    | 2792             | 3025 |
| Gasoline, Mt gasoline       |                  |      |
| On-road                     | 71               | 69   |
| Diesel, Mt diesel           |                  |      |
| On-road                     | 72               | 92   |
| Off-road                    | 26               | 42   |
| Diesel sum                  | 98               | 134  |

<sup>a</sup> Including coal and derived coal (coke, briquettes).

<sup>b</sup> Coal consumptions for heating are distributed into “Power” and “Industry” sectors in ECLIPSE.

**Table S2. Abbreviations of provinces of mainland, China**

| Abbreviation | Province       | Abbreviation | Province |
|--------------|----------------|--------------|----------|
| ANHUI        | Anhui          | JIAX         | Jiangxi  |
| BEIJ         | Beijing        | JILN         | Jilin    |
| CHOQ         | Chongqing      | LIAO         | Liaoning |
| FUJN         | Fujian         | NINX         | Ningxia  |
| GANS         | Gansu          | QINH         | Qinghai  |
| GUAD         | Guangdong      | SHAA         | Shaanxi  |
| GUAX         | Guangxi        | SHDG         | Shandong |
| GUIZ         | Guizhou        | SHAH         | Shanghai |
| HAIR         | Hainan         | SHXI         | Shanxi   |
| HEBE         | Hebei          | SICH         | Sichuan  |
| HELJ         | Heilongjiang   | TIAJ         | Tianjin  |
| HENA         | Henan          | TIBT         | Tibet    |
| HUBE         | Hubei          | XINJ         | Xinjiang |
| HUNA         | Hunan          | YUNA         | Yunnan   |
| INMO         | Inner Mongolia | ZHEJ         | Zhejiang |
| JIAS         | Jiangsu        |              |          |

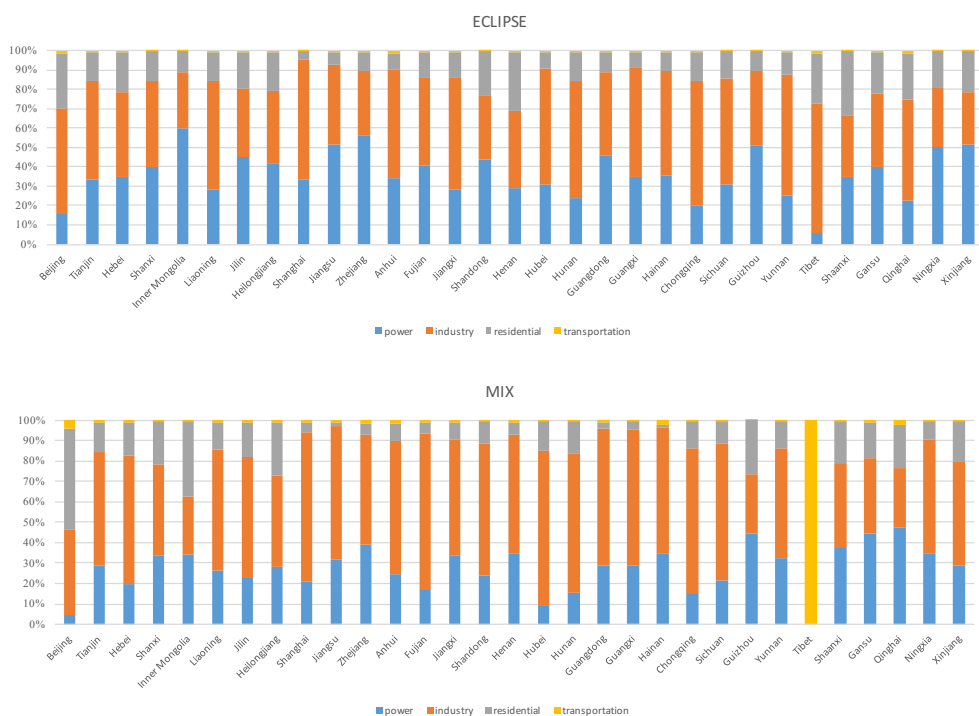

(a) SO<sub>2</sub>

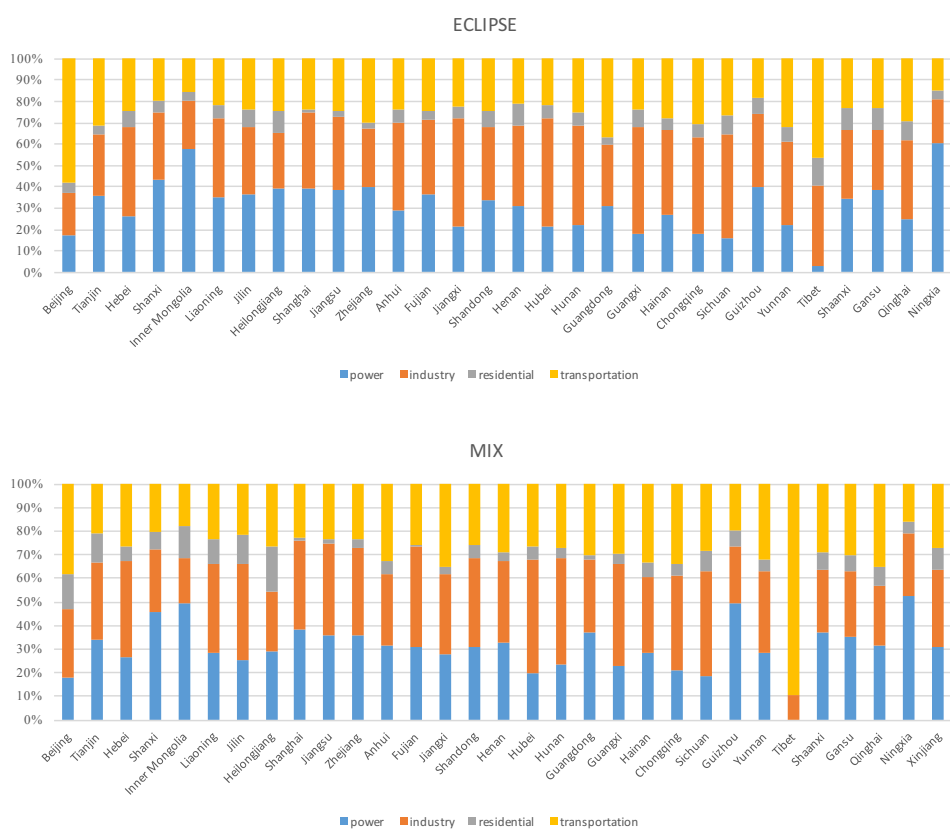

(b) NO<sub>x</sub>

**Figure S1. Sectoral distribution by provinces in ECLIPSE and MIX, 2010.**

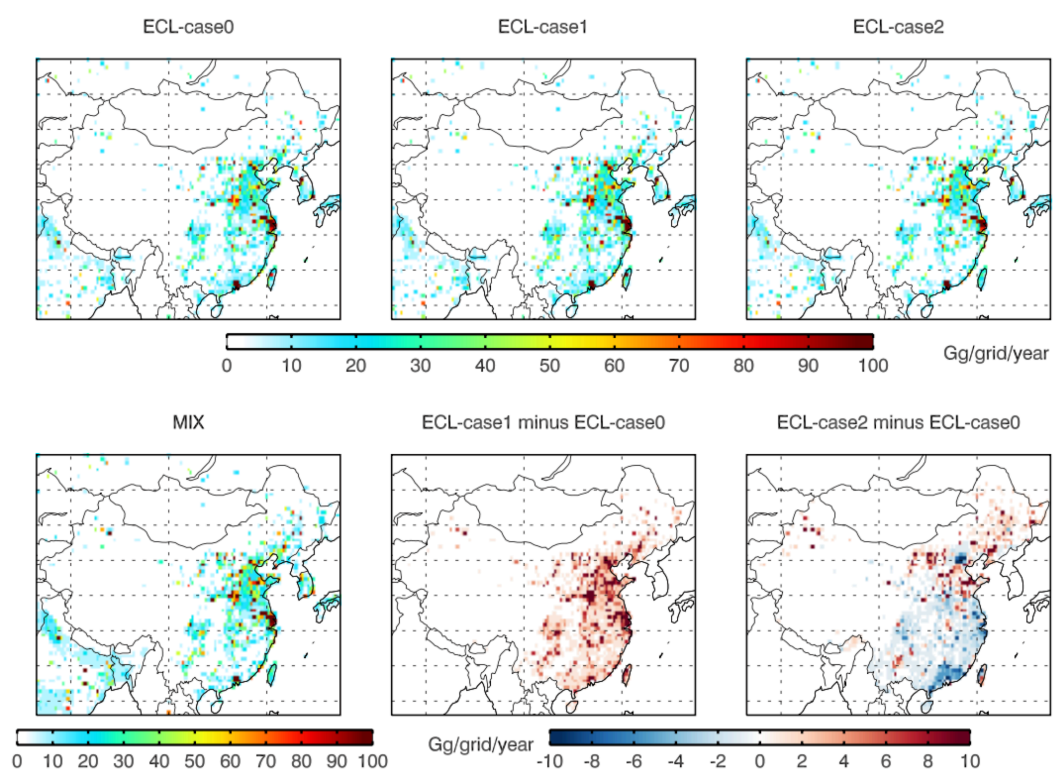

**Figure S2. NO<sub>x</sub> emissions for sensitivity cases in 2010.**

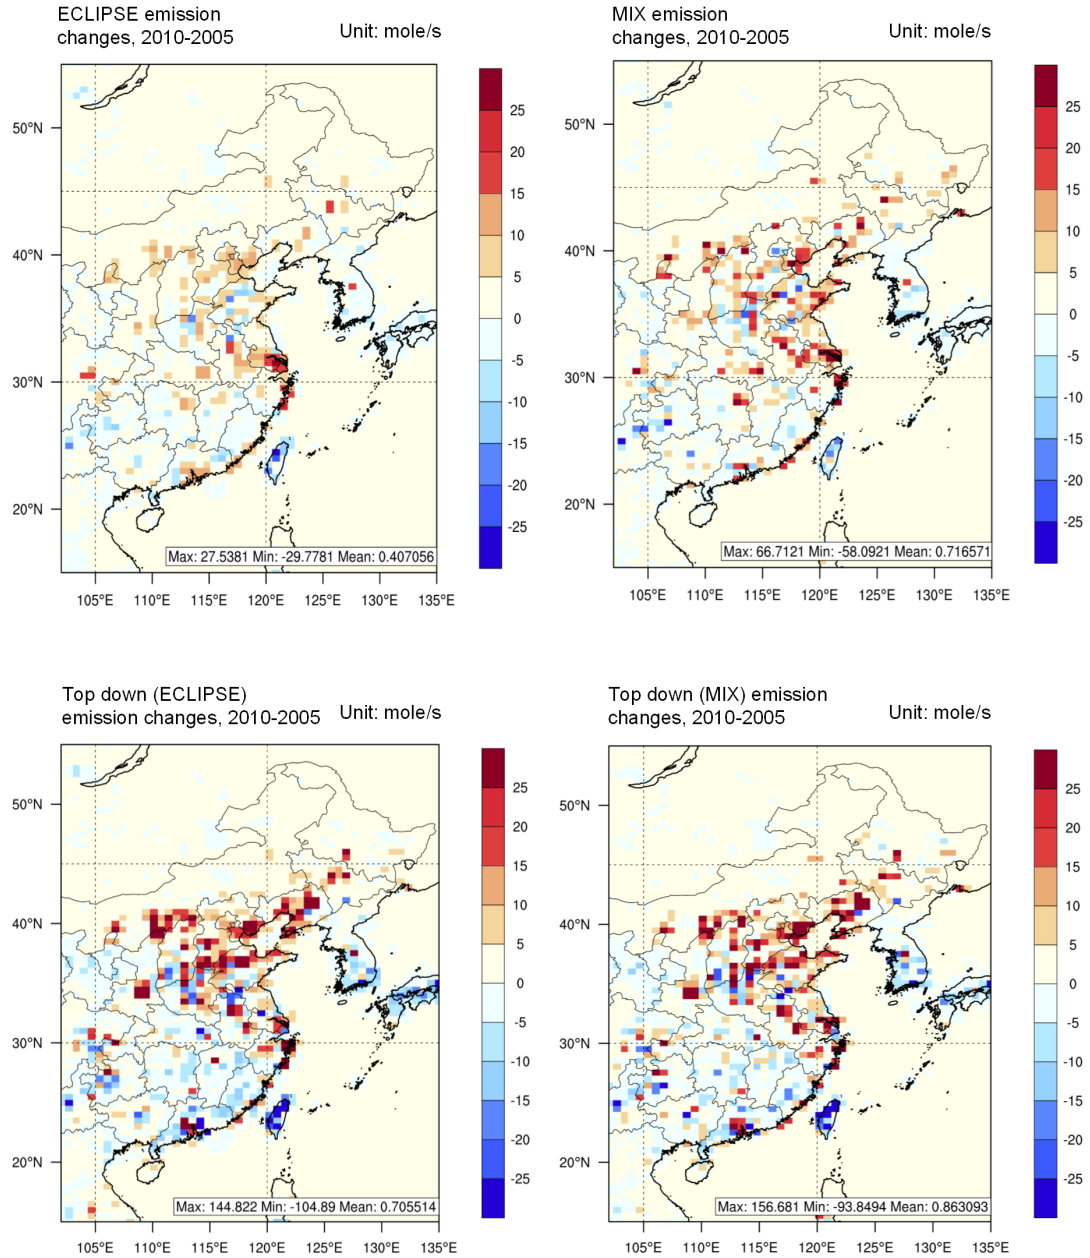

**Figure S3. Emission changes from 2005 to 2010, estimated by ECLIPSE, MIX, and derived top-down emission inventories for each case, summer average (JJA).**
